# Supplementary material for: Transfer of a protein pattern from self-assembled DNA origami to a functionalized substrate
Source: Royal Society of Chemistry journal article supplement (doi:10.1039/c3cc37408d), 2013-01-01
Supplement: c3cc37408d.pdf [file c3cc37408d.pdf]

## **Transfer of a Self-Assembled Protein Pattern from DNA Origami to a Functionalized Substrate**

Katerina Busuttil, Alexandru Rotaru, Mingdong Dong, Flemming Besenbacher, Kurt V. Gothelf.

*Centre for DNA Nanotechnology, Aarhus University, Aarhus 8000, Denmark*

E-mail: kvg@chem.au.dk

|                            |         |
|----------------------------|---------|
| 1. Experimental section    | page S2 |
| 2. DNA origami design      | page S2 |
| 3. Experimental procedures | page S5 |

## Supporting Information

### 1) Materials

*Au substrates* Mica substrates with an epitaxial Au(111) layer 300 nm thick were purchased from Georg Albert PVD, Heidelberg, Germany and annealed in a flame prior to use. Biotinylated hexa(ethylene glycol) undecane thiol (**1**) (Nanoscience Instruments, Phoenix Az, US) was used as received. All unmodified DNA sequences were purchased from DNA Technology A/S in Risskov (Denmark). HPLC purified biotinylated sequences containing the disulfide linker were purchased from Metabion AG (Germany). M13mp18 viral DNA was purchased from New England Biolabs, Inc. Microcon centrifugal filter YM-100 devices (100,000 MWCO, catalogue number: 42413) were purchased from Millipore. The water used was purified on a MilliQ Biocell System.

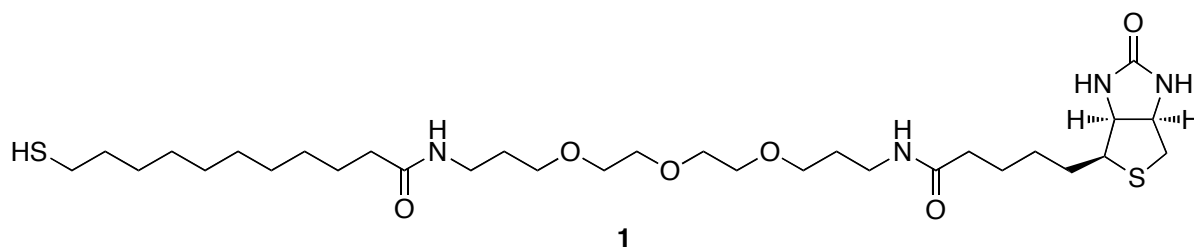

### 2) DNA Origami Design

A schematic representation of the triangle DNA origami structure is shown in Figure S1. The numbering of the staple strands is similar to the original paper.<sup>1</sup> Specific points were chosen on the DNA origami for functionalisation and, when reacted with SAMs, should produce clear, discernible patterns on the surfaces, visible in AFM images.

Supporting Information

Figure S1: Schematic illustration of the triangle DNA origami.

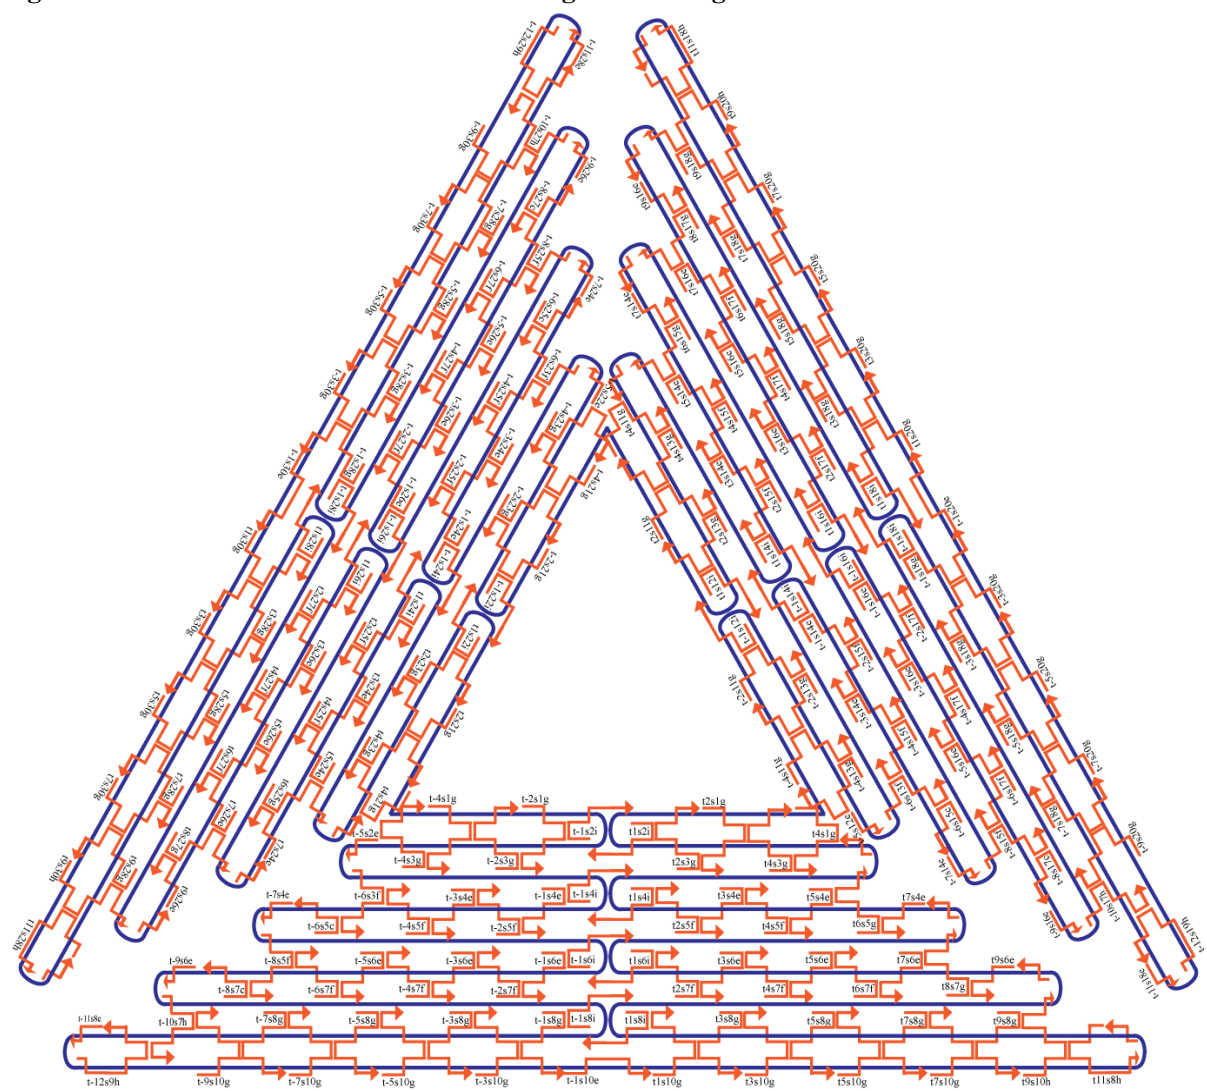

[illegible]

|                              |                                                         |
|------------------------------|---------------------------------------------------------|
| 1. <b>Biotin-SS-t1s16i:</b>  | <b>BIOTIN-TT-S-S-</b> GGCATCAAATTTGGGGCGCGAGCTAGTTAAAG  |
| 2. <b>Biotin-SS-t1s14i:</b>  | <b>BIOTIN-TT-S-S-</b> GTGAGAAAAATGTGTAGGTAAAGATACAACTTT |
| 3. <b>Biotin-SS-t3s14e:</b>  | <b>BIOTIN-TT-S-S-</b> CAATATGACCCTCATATATTTTAAAGCATTAA  |
| 4. <b>Biotin-SS-t3s16e:</b>  | <b>BIOTIN-TT-S-S-</b> CATCCAATAAATGGTCAATAACCTCGGAAGCA  |
| 5. <b>Biotin-SS-t5s16e:</b>  | <b>BIOTIN-TT-S-S-</b> TTAGCAAATAGATTTAGTTTGACCAGTACCTT  |
| 6. <b>Biotin-SS-t5s14e:</b>  | <b>BIOTIN-TT-S-S-</b> TTAATGCCTTATTTCAACGCAAGGGCAAAGAA  |
| 7. <b>Biotin-SS-t1s14e:</b>  | <b>BIOTIN-TT-S-S-</b> ATTTTCTGTCAGCGGAGTGAGAATACCGATAT  |
| 8. <b>Biotin-SS-t1s16e:</b>  | <b>BIOTIN-TT-S-S-</b> ATTCGGTCTGCGGGATCGTCACCCGAAATCCG  |
| 9. <b>Biotin-SS-t3s16e:</b>  | <b>BIOTIN-TT-S-S-</b> GACAACAAGCATCGGAACGAGGGTGAGATTTG  |
| 10. <b>Biotin-SS-t3s14e:</b> | <b>BIOTIN-TT-S-S-</b> GTTTTGTCAGGAATTGCGAATAATCCGACAAT  |

### Additional list of modified staple sequences to form the V-shape:

- |                       |                                                  |
|-----------------------|--------------------------------------------------|
| 11. Biotin-SS-t1s24i: | BIOTIN-TT-S-S- CCTGATTAAAGGAGCGGAATTATCTCGGCCTC  |
| 12. Biotin-SS-t1s26i: | BIOTIN-TT-S-S- GCAAATCACCTCAATCAATATCTGCAGGTCTGA |
| 13. Biotin-SS-t3s24e: | BIOTIN-TT-S-S- TAATCCTGATTATCATTTTGC GGAGAGGAAGG |
| 14. Biotin-SS-t3s26e: | BIOTIN-TT-S-S- TTATCTAAAGCATCACCTTGCTGATGGCCAAC  |
| 15. Biotin-SS-t5s24e: | BIOTIN-TT-S-S- AATGGAAGCGAACGTTATTAATTTCTAACAAC  |
| 16. Biotin-SS-t5s26e: | BIOTIN-TT-S-S- TAATAGATCGCTGAGAGCCAGCAGAAGCGTAA  |
| 17. Biotin-SS-t1s24e: | BIOTIN-TT-S-S- CAGTTTGACGCACTCCAGCCAGCTAAACGACG  |
| 18. Biotin-SS-t1s26e: | BIOTIN-TT-S-S- GCCAGTGCGATCCCCGGGTACCGAGTTTTTCT  |
| 19. Biotin-SS-t3s24e: | BIOTIN-TT-S-S- TG TAGATGGGTGCCGGAAC CAGGAACGCCAG |
| 20. Biotin-SS-t3s26e: | BIOTIN-TT-S-S- GGTTTTCATGGTCATAGCTGTTTGAGAGGCG   |

### 3) Experimental procedures

#### *Assembly of the DNA Origami*

Triangular shaped DNA origami were formed according to a modified version of Rothemund's method with a molar ratio of 1:30 between the viral DNA (5 nM) and each of the staple strands and biotin modified strands in the 1 x TAE-Mg<sup>2+</sup> (tris, 40 mM; EDTA, 2 mM; magnesium acetate, 12.5 mM; adjusted to pH 8.0 with acetic acid) in a total volume of 100 µl. The solution annealing was performed by gradually decreasing the temperature from 65 °C to 4 °C in 2 h on an Eppendorf Mastercycler Personal machine. After annealing the sample was purified using a Microcon centrifugal filter (100,000 Da MWCO, 300 x g speed, 15 min) followed by washing with the 1 x TAE-Mg<sup>2+</sup> to remove excess staple strands. 5 nM solutions of biotin-modified origami solutions were incubated with 2 µl of 50 µM streptavidin for 1 h, mixing gently at 500 rpm and 4 °C and filtered using 100kDa filters to remove excess streptavidin.

#### *Preparation of self-assembled monolayers*

All glassware was cleaned with piranha solution, H<sub>2</sub>SO<sub>4</sub>/H<sub>2</sub>O<sub>2</sub>, 70:30 (v/v) (Caution! Piranha solution is a strong oxidizing agent and should be handled with care.), rinsed with deionised water (18.2 MΩ·cm) and dried in an oven at 150 °C. Thiolate monolayers were prepared by immersion of the freshly annealed Au substrates in a 1 mM solution of thiol **1** in degassed ethanol for 18 h at room temperature. Modified substrates were rinsed in copious amounts of ethanol and dried in a stream of N<sub>2</sub> gas.

#### *Self-assembled monolayer modification*

2 µl of the streptavidin-bound DNA origami were deposited onto the biotinylated SAMs' surface together with 8 µl of 1 x TAE-Mg<sup>2+</sup> and allowed to react for 24 hrs. The samples were then rinsed with 10 ml of 1 x TAE, 12.5 mM Mg<sup>2+</sup> buffer. A 50 mM solution of TCEP dissolved in 1 x TAE, 12.5 mM Mg<sup>2+</sup> buffer was added to the sample surface and left for 5 h to cleave the disulfide bond between the DNA origami and the SAM. The samples were finally rinsed with C<sub>2</sub>H<sub>5</sub>OH/H<sub>2</sub>O, 50:50 (v/v) and dried in a stream of N<sub>2</sub> gas.



Supporting Information

*Scanning Force Microscopy*

Olympus micro cantilever tapping mode probes with a  $26.1 \text{ N m}^{-1}$  nominal spring constant and 300 kHz frequency were used as received on a Multimode Nanoscope (III) scanning force microscope (Veeco Instruments, Santa Barbara, CA), operated in air, for the images on Au substrates. Olympus OMCL-TR400 PS scanning force microscopy probes with a  $0.08 \text{ N m}^{-1}$  nominal spring constant and a frequency of 34 kHz were used as received on a Multimode Nanoscope (III) scanning force microscope (Veeco Instruments, Santa Barbara, CA), operating under fluid for the images on mica.

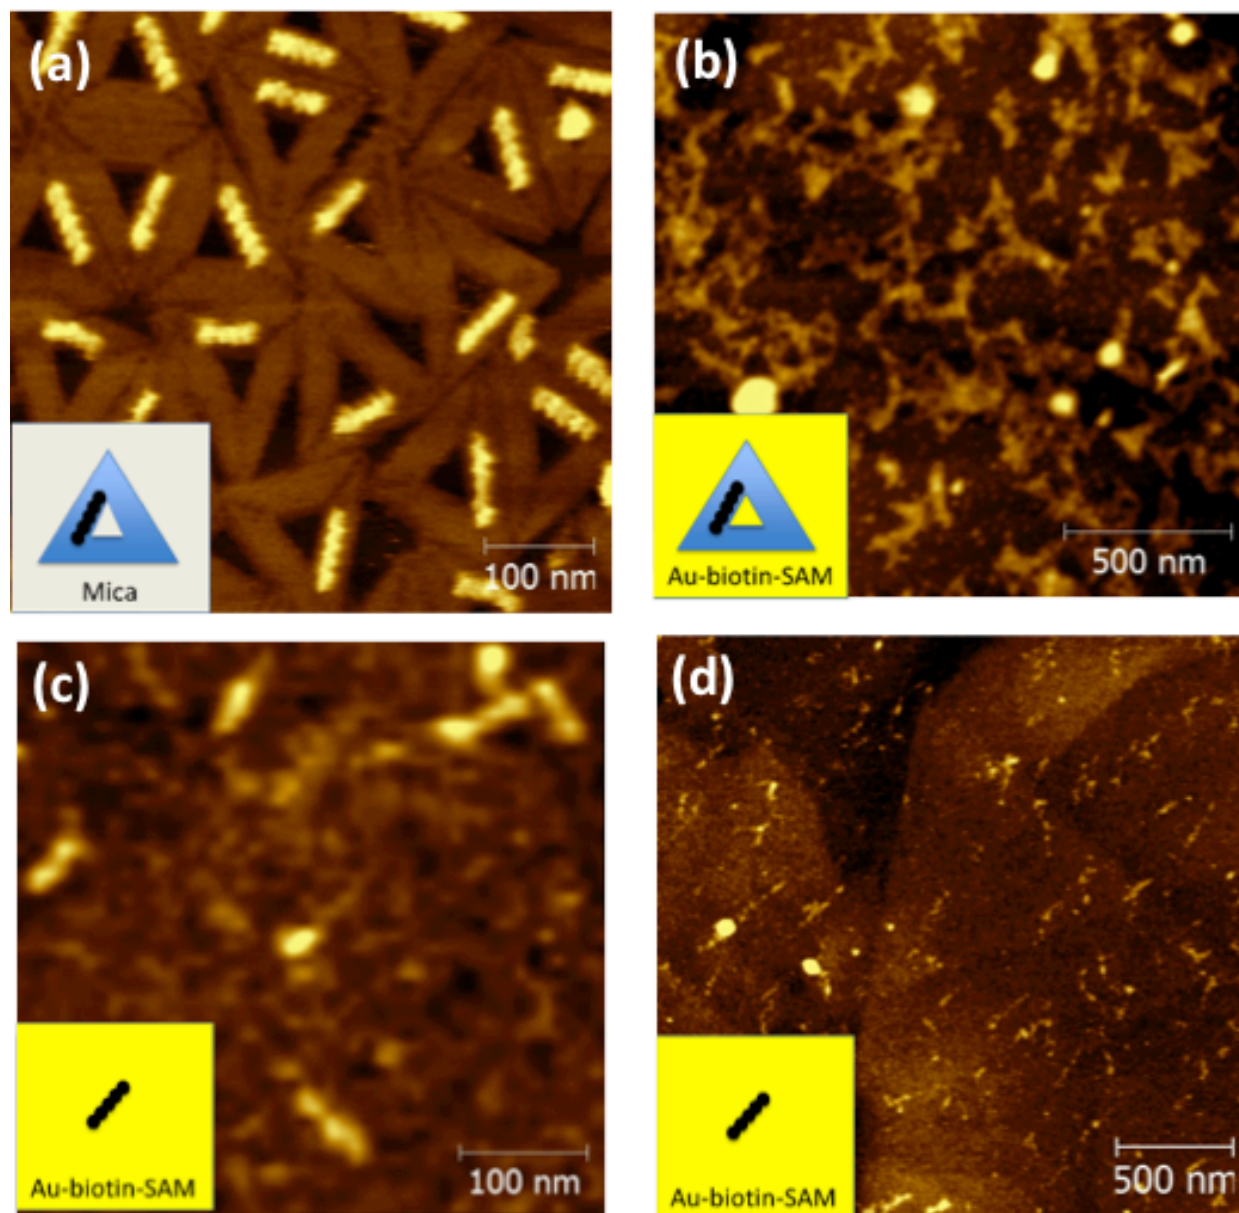

**Figure S3** Triangle DNA origami with 10 streptavidins in a line pattern. a) AFM imaging on mica, b) AFM imaging on a biotinylated Au-SAM, c) and d) AFM imaging on a biotinylated Au-SAM after cleavage of the origami with TCEP.

Supporting Information

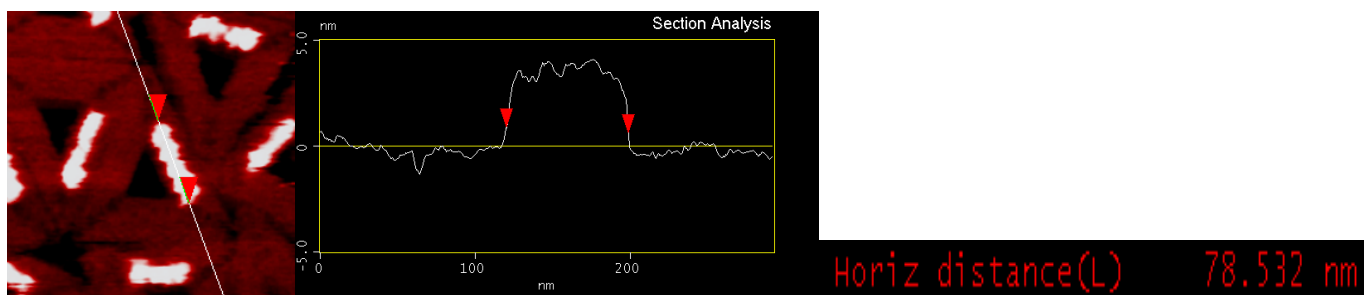

**Figure S4** Profile measurement of a streptavidin pattern on the DNA origami nanostructures deposited on a mica surface.

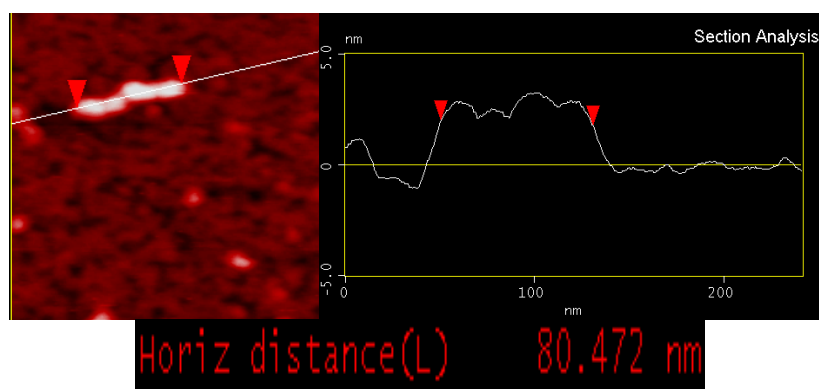

**Figure S5** Profile measurement of a streptavidin pattern after transfer to the SAM biotinylated surface. The profile height and the horizontal distance is comparable to the streptavidins pattern measured in Figure S4.

# Supporting Information

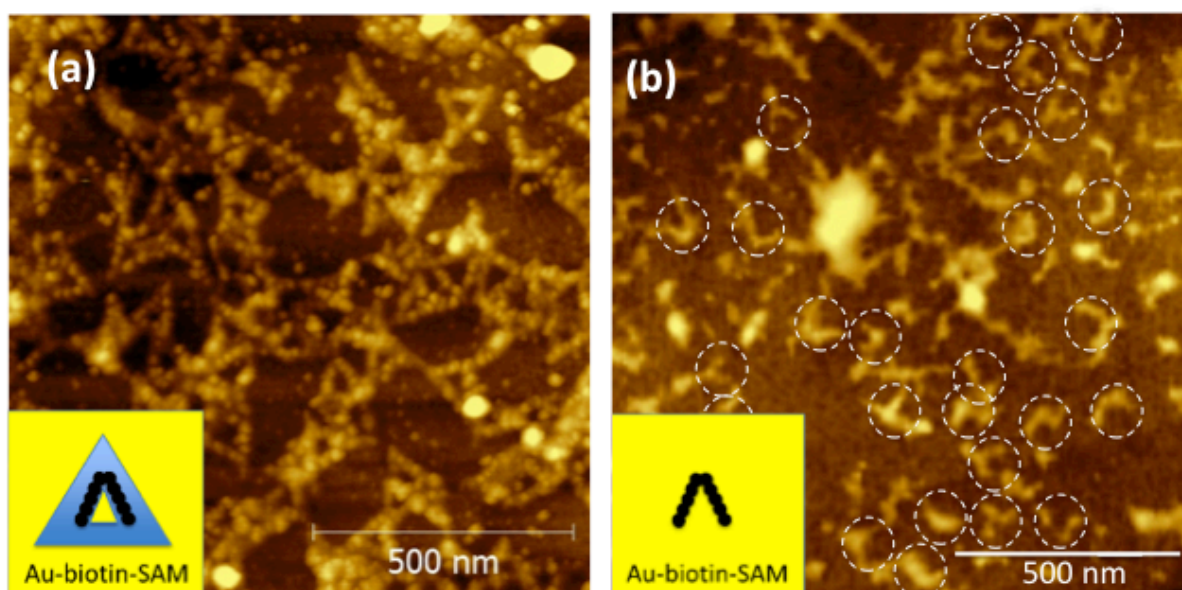

**Figure S6** Triangle DNA origami with 20 streptavidins in a V pattern. a) AFM imaging on a biotinylated Au-SAM, b) AFM imaging on a biotinylated Au-SAM after cleavage of the origami by TCEP. The white circles indicate V shaped patterns.

## SAM reactivity

Tests were carried out to determine the reactivity of the biotin immobilised on the SAMs. 2  $\mu$ l of 50 mM streptavidin solution were placed on the SAM surface and left to react for 1 h before rinsing and imaging. Streptavidin molecules were observed on the SAM surface (Figure S7c) however the coverage was incomplete.

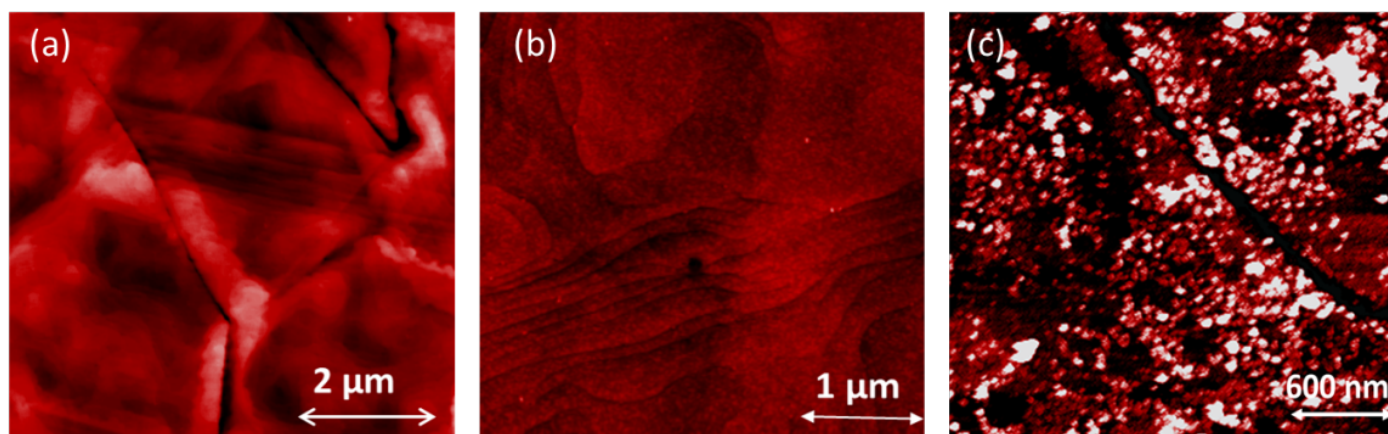

**Figure S7.** (a) Annealed Au surface, (b), biotinylated SAM on Au, (c) streptavidin modified SAM on Au.

## References

- (1) Rothmund, P. W. K. *Nature* **2006**, *440*, 297.
